# Supplementary material
Source: Springer Nature journal article supplement (https://www.springermedizin.de/resource/supplementary/12889_2009_2266_MOESM3_ESM.pdf/9485198)

NTP  
(PUBLIC SECTOR)

PRIVATE SECTOR

FIRST-TIME  
TREATMENT  
CASES

$z_1$   
(DS)

$z_5$   
(DR)

$z_6$   
(DR)

$z_2$   
(DS)

RETREATMENT  
CASES

$z_3$   
(DS)

$z_7$   
(DR)

$z_8$  (DR)

$z_4$  (DS)

**TREATMENT STATES**

$z_1$ : new DS TB; public

$z_2$ : new DS TB; private

$z_3$ : retreatment DS TB; public

$z_4$ : retreatment DS TB; private

$z_5$ : new DR TB; public

$z_6$ : new DR TB; private

$z_7$ : retreatment DR TB; public

$z_8$ : retreatment DR TB; private

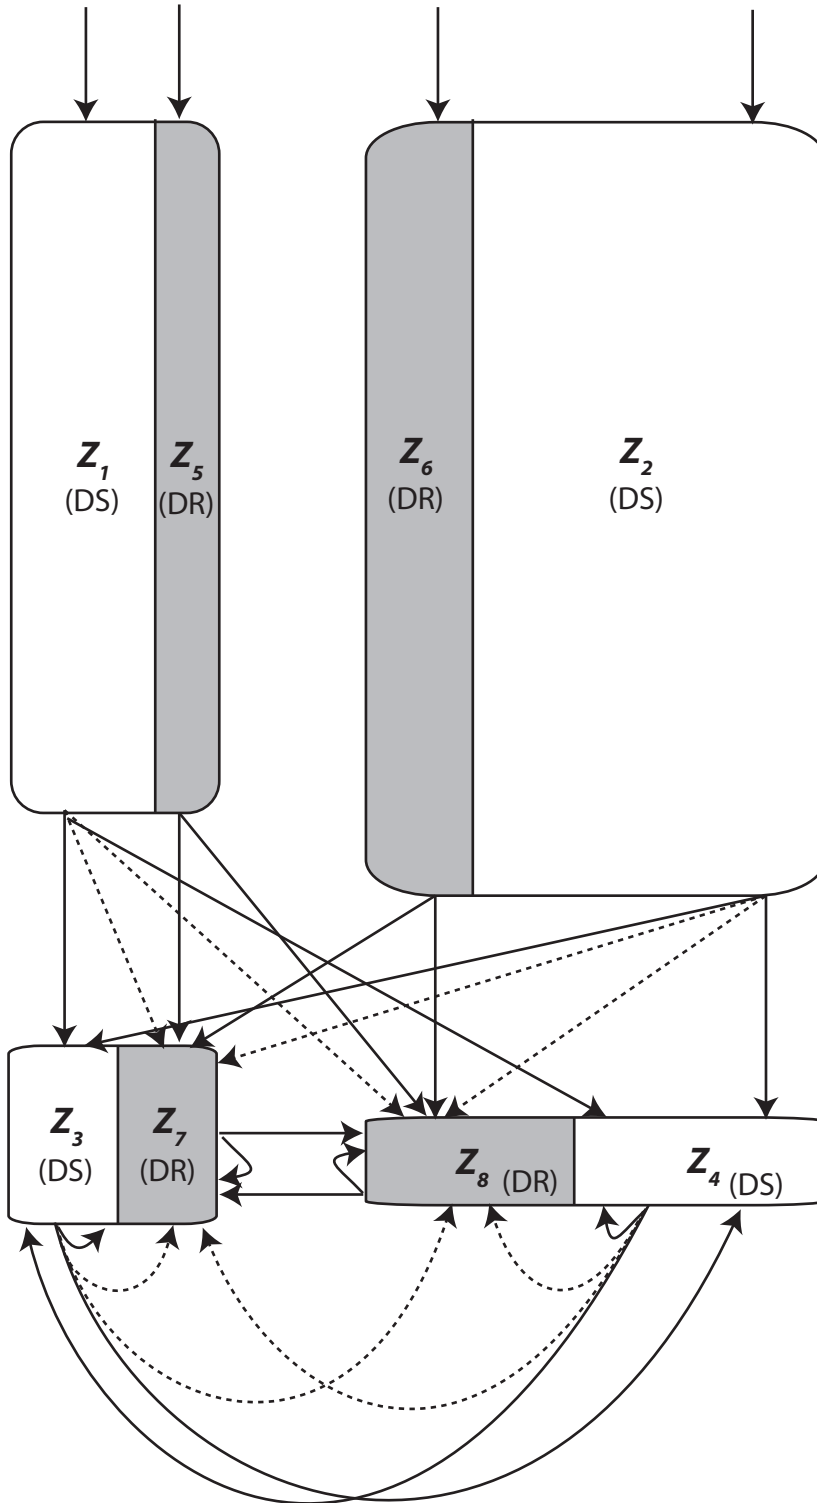

Supplement: MOESM3 [file 9485198]
